# Supplementary material
Source: PubMed Central journal article supplement (PMC167179)
Supplement: plntcell_15_8_1918__2.pdf [file plntcell_15_8_1918__2.pdf]

**Supplemental Figure 2.** Alignment of Selected Plant and Cyanobacterial ARC6-like Proteins.

Also included are the *Arabidopsis* ARC6 homologue At3g19180, and the *E. coli* DnaJ. Accession numbers and organism names are given in Table 2. Shaded columns indicate similarity (gray) and identity (black) greater than 70%. The J domain position is indicated below the sequence. Underlining in each sequence indicates the position of a transmembrane (TM) domain, as predicted by the DAS server (see Methods).

|             |     |                                                                                                      |
|-------------|-----|------------------------------------------------------------------------------------------------------|
| Nostoc      | 1   | -----                                                                                                |
| Scc_PCC7942 | 1   | -----                                                                                                |
| Syn_PCC6803 | 1   | -----                                                                                                |
| Pm_MED4     | 1   | -----                                                                                                |
| Oryza       | 1   | <u>MEGFHNLLARPNSAPFAFSLPRPRPRRRRPPHPSPAACRAASRWAERLFADFHLLPTAAPSDP-PSPAPAPAAAAPSASPFVPLFPDAAE</u>    |
| Arabidopsis | 1   | <u>MEALSHVGIG--LSPFQLCRLPPATTKLRRSHNTSTTIC-SASKWADRLLSDFNFTSDSSSS----SFATATTTATLVSP--PPSIDRPE</u>    |
| At3g19180   | 1   | <u>MPVAYTFPVLPSCLLCGISNRSTSFVVDRELOISGLLVVRSESGEFFGSGLSLRRFQREGRRRLNAAGGGIHVVVDNAPSRTSSLAAST</u>     |
| Eco DnaJ    | 1   | -----                                                                                                |
|             |     |                                                                                                      |
| Nostoc      | 1   | --MRIPLDYRILGLPLAASEEQLRQAYS DRIVQ-LPRREYSQA AISSRKQLIEEAYVVLSDPKQRSTYDQLYL AHAYDPDNLAAA AVAQ        |
| Scc_PCC7942 | 1   | --MRIPLDYRILCVGVQASADKLAESYRDRINQ-SPSHEFSELALQARRQLLEAAIAE LSDPEQRDRYDRRFFQG-----                    |
| Syn_PCC6803 | 1   | --MFIPLDFYRILGIPPQSGGETIEQAYQDRLLQ-LPRREFSDAAVTLRNQLLAIAIAYETLRDPEKROAYDQEWGAMDEALG-----             |
| Pm_MED4     | 1   | --MELPLDHFRLIGVSPSATSEEILRAFQLRLDK-TPDEGFTYEVLTORSELLRLTADLLTDPDSRRDYENLLNG-----                     |
| Oryza       | 90  | <u>RSLPLQVDFYKVLGAEPHFLGDGIRRAFEARIAK-PPQYGYSTDALVGRROMLQIAHDTLMNQNSRTQYDRALSEN-----</u>             |
| Arabidopsis | 82  | <u>RHVPIPIDFYQVLGAQTHFLTGDGIRRAFEARVSK-PPQFGFSDDALISRRQILQAACETLSNPRSRREYNEGLLDD-----</u>            |
| At3g19180   | 91  | <u>STIELPVTCTYQLIGVSEQA EKDEVVKSVINLKKT-DAEEGYTMEAAAARQDILMDVVRDKLLFESEYAGNLKEKIAP-----</u>          |
| Eco DnaJ    | 1   | ---MAKQDYIEILGVSKTAEEREIRKAYKRLAMKYHPDRNQGDKEAEAKFKEIKEAYEVLTD SQKRAAYDQYGHAA-----                   |
|             |     | ----- J Domain -----                                                                                 |
|             |     |                                                                                                      |
| Nostoc      | 88  | <u>ENRTESTKRGSDTQSLGIEITQDELVGALLILQELGEYELVLKLG RPYLVNKN SATSSRKSNNLADEE IYESAEHPDVVLTVALACLELG</u> |
| Scc_PCC7942 | 73  | -----GLEAIEPSLELEDWQRIGALLILLELGEYDRVSQ LAEELL PDYD-----ASA EVRDQFARGDIALAIALSQQSLG                  |
| Syn_PCC6803 | 79  | -----EALPLTTPELECSPEQEIGALLILLDLGEYELVVKYGE PVLHDPN-----PPAGGLPQDYLLSVILAHWELS                       |
| Pm_MED4     | 73  | -----ASGLDLSSNREVAGLILLWESGSSKEAFKITRKALQPPQ-----TPALGSSREADLTLLAALTSRDAA                            |
| Oryza       | 164 | -----REEALTMDIAWDK-----EAGEALAVLVTGEQLLDRP-----PKR FKQDVVLAMALAYVDLS                                 |
| Arabidopsis | 156 | -----EEATVITDVPWDKVP GALCVLQEGGETEIVLRVGEALLKERL-----PKSFKQDVVLV MALAFLDVS                           |
| At3g19180   | 165 | -----KSPIRIPWAWLPGALCLLQEVGQEKLVLDIGRAALRNLD-----SKPYIHDIFLSMALAECAIA                                |
| Eco DnaJ    | 73  | -----F-----EQGG-----MG-----GGGFGGADFSDFG--DVF                                                        |

Nostoc 178 REQWQQG--HYENAAISLETGQELLVREGL---FSSIQAETIADLYKLRPYRILELLALPQ--EKTAERSQGLELLQNLLEDRCGIDGTN  
Scc\_PCC7942 144 RECROQG--LYEQAAQHFRSQSALADHQ---FPELSRTLHOEQQLRPYRILERLAQPL--TADSDRQOGLLLQAMLDDRQIEGPG  
Syn\_PCC6803 147 RERWQQQ--QYEFAAATASLKALARLQDND---FPALAEAIROELYRLRPYRILELLAKEG--QGEEQRQOGLLALQAMVQDRGGIEGKG  
Pm\_MED4 137 IQEQDQR--SYSNAADFLOEGIQLLQRMGK---LGELRKTLEEDLVSLLPYRILDLLSRDLN--DYDSHKKGLSMLNLI IKRGGLECKN  
Oryza 218 RDAMAASPPDVIGCCEVLERALKLLIQEDGASNLAPDILLSQIDETLEEITPRCVLELLSLPIDTEHHKKRQEGLOGARNILWSVGRG-GIA  
Arabidopsis 219 RDAMALDPPDFITGYEFVEEALKLLIQEEGASSLAPDLRAQIDETLEEITPRYVLELLGLPLGDDYAAKRLNGLSGVRNIIWSVGGG-GAS  
At3g19180 225 KAAFEVN--KVSQGFELARAQSFLKSKVTLG-KLALLTQIEESLEGLAPPCTLDLLGLPRTPENAEERRGATAALRELLRQGLSVEASC  
Eco DnaJ 99 GDIFGGG-----RGRQRAARGADLRYN-----MELTLEEAARGVTKEIRIPTLEECDCVCHGSGAKPGTQPQTCTCHGSGQVQMRQ

Nostoc 261 ND--ESGLNIDDFLRFIQQLRNHLTVAEQHKLFEAQSK--RSSAV-----ATYLAVYALIARGFAQROPALIROARQMLVRLGKR---  
Scc\_PCC7942 227 DD--GSGLTLDNFMFLQOIRGYLTLAEQQLLFESEAR--RPSA-----ASFFACYTLIARGFCDHOPSLIHRASLLHHEIKSR---  
Syn\_PCC6803 230 ED--YSGLGNDDFLKFQHQLRCHLTVAEQNALFLPESQ--RPSLV-----ASYLAVHSLMAEGVKEQDPMAIVEAKSLIIQLENC---  
Pm\_MED4 220 KSEYNDFLNQEFESFQOIKPFLTVQDQIDLFLLELOK--RGSSE-----AGFLAFLSLTAIGFARRKPAKLFARKILKKNLNSG---  
Oryza 307 TV--GGGFSR---EAFMNEAFLRMTSIEQMDFFSKTPNSIPPEWF-----EIYNVALAHVAQAIISKRPQFI MMADDLFEQLQKFNIG  
Arabidopsis 308 AL--VGGLTR---EKFMNEAFLRMTAAEQVDLFFVATPSNIPAESF-----EVYEVALALVAQAFIGKPHLLQDADKQFQOLQOAKVM  
At3g19180 312 QIQDWPCFLSQAISRLIATEIVDLLPWDDLAIITRKNKKSLESHNQRVVIDFNCFYMVLLGHIAVGFSGKQNETINKAKTI CECLIASEG-  
Eco DnaJ 175 G-----EFVAVQOTCPHCQGRGTILIKDPCN-----KCHGHGRVRSKTL SVKIPAG---

Nostoc 336 -----QDVHLEQSLCALLLIGOTEAEATRVLELSQEY-----EALAFIREKSQDS--PDLPLGLCLYAEQWLQHEVFPHF  
Scc\_PCC7942 302 -----MDVHIEQAIASILLIGOPEEAEALLVQSQDE-----ETLSQIRALAQG--EALIVGLCRFTETWLATKVFPDF  
Syn\_PCC6803 305 -----QDLALEKVICELLIGOTEVVLAADIDQGDPK-----IVAGLESKLATG--EDPLTAFYTFTEQWLEEEIVPYF  
Pm\_MED4 298 -----LDSMPLIGCLDLLADVEQSSARFLSSSDE-----KLRDWLNYPGE-----KLEAICIFCKNWLNDVVLVGY  
Oryza 384 ----SHYAYDN----EMDLALERAFCSLLVGDVSKCRMWLGIDNESSPYRDPKILEFIVTNSSISENDLPLGCKLLETWLI FEFVFRS  
Arabidopsis 386 AMEIPAMLYDTRNNWEIDFGIERGLCALLIGKVDECRMWLGLDSEDSQYRNPAIVEFVLENSNR--DDNDLPLGCKLLETWLAGVVFPRF  
At3g19180 400 -----VDLKFEAEAFCSFLLKQSGSEAEALEKCLKLES-----NSDSAVRNSILG--KESRSTSATPSLEAWLMESVLANF  
Eco DnaJ 219 -----VDTGDRIRLAGEGEAGEHGAPAG-----DLY--VQVQVK-----

Nostoc 403 RDLANQQAFLKDYFANQOVQAYLEALPTDAQTTNEWAVINPQYFPQAKAKNTHFHNNSTKTSASFNHSRVPNPD-----LPETPTKE  
Scc\_PCC7942 368 RDLKERTAPLQPYEDDPVQTYLDAI-----VELPSDLMPTP-----LPVEPLEV  
Syn\_PCC6803 371 RDLSPETLSPKAYFNNPSVQOYLEQLEPDSFTTDN-SFASPALLSTATESETPMVHSSAALPDRPLTSTVPSR-----RGRSPRRS  
Pm\_MED4 362 RDIDLKEIDLDSWFEDREIQEFIEQIEKKSNTTVFKSGPQNKPIFOAQESLKDSSTGPDLSNDNFEEGRLLPLPGG-----VREDGOEV  
Oryza 467 RDTRGMQFRI GDYYDDPEVLSYLERMEGGASH----LAAAAIAKLGQAATAALGTVKSNAIQAFNKVFP-----LIE  
Arabidopsis 475 RDTKDKKFKLGDYYDDPMVLSYLERVEVVGSP----LAAAAAMARIGAEH----VKASAMQALQKVFPSPRYTDRNSAEPKDVQETVF  
At3g19180 468 PDTRGCSPSLANFFRAEKKYPENKMGSPSIMNHKTNRPLSTTQFVNSSQHLYTAVEQLTPTDLQSPVVS AK-----NNDETSA  
Eco DnaJ 251 -----QHPIEFEREGNNLYCEVP-----

Nostoc 485 TSEYPNFSPPMWSSSGSIKSEVP-AAERMSRGTN-QHLNGSAKSAASHGNQKRRRRKPTPSASRERI PDNRPHSRRPRRRRTFANTIEGK  
Scc\_PCC7942 413 RSSLLAKELPTPATPG-----VAPPPRRRRRDRSERPARTAKRLP-----  
Syn\_PCC6803 451 RDDVFPADNSSGLAVTTLSPAI-AYDTHSLGTNGIGDSTSNFGSSNSAPESTSKHKSPPRRRKRVT-----RGRSPRRS  
Pm\_MED4 445 IEENIYTDEI IKNKSI EFKYKIAIEKIAELKFVFGAELENYRIFNKSSYLTYLYAFLILFAFGLGVGFVRN-----  
Oryza 537 QLDRSAMENTKDG-PGGYL-----ENFDQ-----ENAPAHDSRNAA-----  
Arabidopsis 555 SVDPVGNVGRDGE PGVFIAEAVRPSENFETN-----DYAIRAGVSESSVDETTVEMSVADMLKEAS-----  
At3g19180 548 SMPVQLKRNLGVHKNKIWDEWLSQSSLI GRVSVVALLGCTVFFSLKLSGIRSGRLQSMPI SVSARPHSE-----  
Eco DnaJ 268 -----INFAMAALGG-----

Nostoc 573 **TRLVWRVFISLVSILVFWVLATTTFGWLKNLFFPQPSPPD--LQLFVQINQPPLPIPDNRK--PESEEGPLTNAEAEV IHTWLS TKAA**  
 Scc\_PCC7942 452 **--LPW---IGLG-VVVVLGGGTGVWAWRSRSNSTPPTPP----P---VVQTLPEAVPAPS----PAPVTVALDRAQAETVLQNWLAAKAA**  
 Syn\_PCC6803 517 **-IKPVRFGIFLLCLAGIVGGATALIINRTGDPLGGLLED----PLDVFLDQPSEFIPDEATSRNLILSQPNFNQQVGMVVQGWLD SKKL**  
 Pm\_MED4 514 **--NLKKPVQEKI I DNSLSINENKNVFEYGLNQDDKKKVL--DNSKIILSDNAEKVIFSG----EEIKTASPSLEKIENLINTWLVN KSK**  
 Oryza 571 **-----LKIISAGALFALLAVIGAKYLPKRRLSAIRSEH-----GSVAVANSVDSTDDPALDE-DPVHI PRMDAKLAEDIVR KWQS I KSK**  
 Arabidopsis 616 **-----VKILAAGVAIGLISLFSQKYFLKSS--SSFQRKD-----MVSSMESDVATIGSVRAD--DSEALPRMDARTAENIVSKWQKIKSL**  
 At3g19180 618 **SDSFLWKTESGNFRKNLDSVNRNGIVGNIKVLIDMLKMHCGEHPDALYLKSSGQSATSLSHS-ASELHKRPMDEEAEELVRQWENVKAE**  
 Eco DnaJ 278 **-----EIEVP**

Nostoc 659 **ALGPNHEINNLEQ I LTGSALSQWRLIAQONKLDNRYRKF DHSLKIESVEKIGLF---ADRAAVEATVKEVTQLYE--NNQFKNSSNDK-L**  
 Scc\_PCC7942 526 **ALGPQYDRDRLATVLTGEVLQ TWQGFSSQOANTQLTSQFDHKLTVDSVQ-LSDG---DQRAVVQAKVDEVEQVYR--GDQLLETRRDLGL**  
 Syn\_PCC6803 603 **AFGQNYDVGALQSVLAPNLLAQQRGRAQRDQAQKVYHQYEHKLOILAYQVNPQD---PNRATVTARVEEISQPF TLGNQQQKGSATKDDL**  
 Pm\_MED4 597 **FLAGKGEIN-LSKIVQDDLIDRLKKERELDIQKGIYKNINAN--IENIVLLTQT---ASRISVSVDLKYSEKILKIDGELINETTFTPFL**  
 Oryza 651 **ALGPEHSVASLQEVLDGNMLKVWTDRAAEIERHGWFWEYTLSDVTIDSITISLD---GRRATVEATIDEAGQLTD-VTEPRNND SYDTKY**  
 Arabidopsis 693 **AFGPDHRIEMLPEVLDGRMLKIWTDRAAETAQLGLVYDYTLKLSVDSVTVSAD---GTRALVEATLEESACLSD-LVHPENNATDVRTY**  
 At3g19180 707 **ALGPTHQVYSLSEVLDSEMLVQWQTLAQTAEAKSCYWRVLLHLEVLQAHIFEDGIAGEAAEIEALLEEAAELVD--ESQPKNAKYYSTY**  
 Eco DnaJ 284 **TLDGRVKLKVPGETQTGKIFR-MRGKGVKSVRGAQGDLLCRVVVETPVGLNER----QKQLLQELQESFGGPTGEHNSPRSKSFFDGVK**

Nostoc 743 **RVR YDLIRER-GKWRIQSTSVVNQFTR**  
 Scc\_PCC7942 610 **VIRYQLVREN-NIWKIASISLVR----**  
 Syn\_PCC6803 690 **TVRYQLVRHQ-GVWKIDQIQVVNGPR-**  
 Pm\_MED4 681 **KVKYILGFSN-NSWKLVDYISGV----**  
 Oryza 737 **TTRYEMAFSKLGGWKITEGAVLKS---**  
 Arabidopsis 779 **TTRYEVFWSKSG-WKITEGSVLAS---**  
 At3g19180 795 **KIRYILKKQEDGLWKFCQSDIQIQK--**  
 Eco DnaJ 369 **KFFDDLTR-----**
